# Supplementary material for: Distressed Democrats and relaxed Republicans? Partisanship and mental health during the COVID-19 pandemic
Source: PubMed Central journal article supplement (PMC9022799; doi:10.1371/journal.pone.0266562), 2022-04-21
Supplement: pone.0266562.s001.pdf [file pone.0266562.s001.pdf]

# Distressed Democrats and Relaxed Republicans? Partisanship and Mental Health During the COVID-19 Pandemic: SI-Appendix \*

**Sean Bock** *Harvard University*  
**Landon Schnabel** *Cornell University*

This is the appendix to the article entitled ‘Distressed Democrats and Relaxed Republicans? Partisanship and Mental Health During the COVID-19 Pandemic’. We provide additional information on our data, variables, and modeling, as well as supplemental analyses.

Table S1: Weighted descriptive statistics across three waves  
of the NORC COVID-19 Response Survey

| Variable            | Wave 1:<br>(5/21/20 - 5/29/20) |      |    | Wave 2:<br>(6/22/20 - 7/6/20) |      |    | Wave 3:<br>(7/22/20 - 8/10/20) |      |    |
|---------------------|--------------------------------|------|----|-------------------------------|------|----|--------------------------------|------|----|
|                     | N                              | Mean | SD | N                             | Mean | SD | N                              | Mean | SD |
| Party I.D.          | 2271                           |      |    | 2006                          |      |    | 2002                           |      |    |
| ... Democrat        | 1064                           | 47%  |    | 942                           | 48%  |    | 950                            | 49%  |    |
| ... Independent     | 351                            | 16%  |    | 301                           | 16%  |    | 310                            | 16%  |    |
| ... Republican      | 856                            | 37%  |    | 763                           | 36%  |    | 742                            | 35%  |    |
| General unhappiness | 2263                           |      |    | 2007                          |      |    | 1996                           |      |    |
| ... Not too happy   | 325                            | 14%  |    | 287                           | 14%  |    | 286                            | 14%  |    |
| ... Pretty happy    | 1422                           | 63%  |    | 1239                          | 62%  |    | 1222                           | 61%  |    |
| ... Very happy      | 516                            | 23%  |    | 481                           | 24%  |    | 488                            | 25%  |    |
| Emotional problems  | 2269                           |      |    | 2008                          |      |    | 2001                           |      |    |
| ... Never           | 469                            | 19%  |    | 492                           | 24%  |    | 464                            | 22%  |    |
| ... Not very often  | 676                            | 30%  |    | 592                           | 29%  |    | 624                            | 31%  |    |
| ... Pretty often    | 1048                           | 47%  |    | 845                           | 42%  |    | 842                            | 42%  |    |
| ... Very often      | 76                             | 4%   |    | 79                            | 5%   |    | 71                             | 4%   |    |
| Fatigue             | 2273                           |      |    | 2004                          |      |    | 2005                           |      |    |
| ... Never           | 378                            | 16%  |    | 345                           | 16%  |    | 350                            | 17%  |    |
| ... Not very often  | 911                            | 39%  |    | 837                           | 43%  |    | 837                            | 43%  |    |
| ... Pretty often    | 952                            | 43%  |    | 788                           | 39%  |    | 779                            | 39%  |    |
| ... Very often      | 32                             | 2%   |    | 34                            | 2%   |    | 39                             | 2%   |    |
| Mental health       | 2274                           |      |    | 2007                          |      |    | 2001                           |      |    |
| ... Never           | 385                            | 17%  |    | 301                           | 14%  |    | 305                            | 14%  |    |
| ... Not very often  | 863                            | 37%  |    | 786                           | 38%  |    | 779                            | 37%  |    |
| ... Pretty often    | 966                            | 43%  |    | 865                           | 44%  |    | 861                            | 45%  |    |
| ... Very often      | 60                             | 3%   |    | 55                            | 3%   |    | 56                             | 4%   |    |
| Quality of life     | 2276                           |      |    | 2010                          |      |    | 2006                           |      |    |
| ... Never           | 268                            | 13%  |    | 220                           | 11%  |    | 202                            | 11%  |    |

\*Current version: April 13, 2022; Corresponding author: lschnabel@cornell.edu.

Table S1: Weighted descriptive statistics across three waves of the NORC COVID-19 Response Survey (*continued*)

| Variable                         | N    | Mean | SD   | N    | Mean | SD   | N    | Mean | SD   |
|----------------------------------|------|------|------|------|------|------|------|------|------|
| ... Not very often               | 1021 | 43%  |      | 878  | 42%  |      | 905  | 42%  |      |
| ... Pretty often                 | 947  | 42%  |      | 878  | 45%  |      | 862  | 44%  |      |
| ... Very often                   | 40   | 2%   |      | 34   | 2%   |      | 37   | 2%   |      |
| COVID-19 negative reaction scale | 2204 | 3.82 | 3.72 | 1957 | 3.96 | 3.84 | 1962 | 4.08 | 3.95 |
| Negative feelings scale          | 2220 | 3.31 | 2.06 | 1973 | 3.31 | 2.12 | 1954 | 3.25 | 2.11 |
| Loneliness scale                 | 2260 | 7.17 | 3.24 | 1996 | 7.03 | 3.18 | 1982 | 7    | 3.2  |
| Stress scale                     | 2249 | 9.86 | 3.04 | 1985 | 9.76 | 3.18 | 1973 | 9.85 | 3.2  |
| Education                        | 2279 |      |      | 2012 |      |      | 2007 |      |      |
| ... HS or less                   | 528  | 38%  |      | 443  | 38%  |      | 427  | 38%  |      |
| ... Some college                 | 935  | 28%  |      | 814  | 28%  |      | 820  | 28%  |      |
| ... BA or more                   | 816  | 34%  |      | 755  | 34%  |      | 760  | 34%  |      |
| Income                           | 2279 |      |      | 2012 |      |      | 2007 |      |      |
| ... Less than \$50,000           | 1040 | 49%  |      | 886  | 50%  |      | 879  | 49%  |      |
| ... \$50,000 to under \$100,00   | 785  | 32%  |      | 717  | 32%  |      | 710  | 32%  |      |
| ... \$100,000 or more            | 454  | 19%  |      | 409  | 18%  |      | 418  | 19%  |      |
| Employment status                | 2279 |      |      | 2012 |      |      | 2007 |      |      |
| ... Not employed                 | 896  | 42%  |      | 775  | 42%  |      | 750  | 42%  |      |
| ... Employed                     | 1383 | 58%  |      | 1237 | 58%  |      | 1257 | 58%  |      |
| Marital status                   | 2279 |      |      | 2012 |      |      | 2007 |      |      |
| ... Not married                  | 904  | 41%  |      | 775  | 41%  |      | 766  | 41%  |      |
| ... Married/co-habiting          | 1375 | 59%  |      | 1237 | 59%  |      | 1241 | 59%  |      |
| Race                             | 2279 |      |      | 2012 |      |      | 2007 |      |      |
| ... White                        | 1500 | 63%  |      | 1348 | 63%  |      | 1334 | 63%  |      |
| ... Black                        | 237  | 12%  |      | 195  | 12%  |      | 194  | 12%  |      |
| ... Hispanic                     | 370  | 17%  |      | 317  | 17%  |      | 330  | 17%  |      |
| ... Other                        | 172  | 9%   |      | 152  | 9%   |      | 149  | 9%   |      |
| Region                           | 2279 |      |      | 2012 |      |      | 2007 |      |      |
| ... Northeast                    | 359  | 17%  |      | 313  | 17%  |      | 304  | 17%  |      |
| ... Midwest                      | 577  | 21%  |      | 516  | 21%  |      | 522  | 21%  |      |
| ... South                        | 804  | 38%  |      | 700  | 38%  |      | 691  | 38%  |      |
| ... West                         | 539  | 24%  |      | 483  | 24%  |      | 490  | 24%  |      |
| Age                              | 2279 |      |      | 2012 |      |      | 2007 |      |      |
| ... 18-29                        | 263  | 21%  |      | 224  | 21%  |      | 231  | 21%  |      |
| ... 30-39                        | 525  | 17%  |      | 466  | 17%  |      | 481  | 17%  |      |
| ... 40-59                        | 722  | 32%  |      | 650  | 32%  |      | 663  | 32%  |      |
| ... 60-64                        | 248  | 8%   |      | 225  | 8%   |      | 222  | 8%   |      |
| ... 65 or older                  | 521  | 21%  |      | 447  | 21%  |      | 410  | 21%  |      |
| COVID-19: info                   | 2272 |      |      | 2010 |      |      | 2005 |      |      |
| ... Never                        | 30   | 1%   |      | 38   | 2%   |      | 29   | 1%   |      |
| ... Rarely                       | 261  | 11%  |      | 304  | 16%  |      | 262  | 13%  |      |

Table S1: Weighted descriptive statistics across three waves of the NORC COVID-19 Response Survey (*continued*)

| Variable                  | N    | Mean | SD   | N    | Mean | SD   | N    | Mean | SD   |
|---------------------------|------|------|------|------|------|------|------|------|------|
| ... Occasionally          | 837  | 37%  |      | 803  | 40%  |      | 714  | 35%  |      |
| ... Often                 | 888  | 39%  |      | 706  | 34%  |      | 805  | 41%  |      |
| ... Most of the time      | 256  | 11%  |      | 159  | 8%   |      | 195  | 10%  |      |
| COVID-19: hotspot         | 2279 |      |      | 2012 |      |      | 2007 |      |      |
| ... Not a hotspot         | 1772 | 82%  |      | 1572 | 81%  |      | 1554 | 80%  |      |
| ... Hotspot               | 507  | 18%  |      | 440  | 19%  |      | 453  | 20%  |      |
| COVID-19: exposure        | 2279 |      |      | 2012 |      |      | 2007 |      |      |
| ... No                    | 1980 | 87%  |      | 1748 | 86%  |      | 1689 | 85%  |      |
| ... Yes                   | 299  | 13%  |      | 264  | 14%  |      | 318  | 15%  |      |
| COVID-19: family diag.    | 2279 |      |      | 2012 |      |      | 2007 |      |      |
| ... No                    | 2084 | 91%  |      | 1856 | 92%  |      | 1786 | 88%  |      |
| ... Yes                   | 195  | 9%   |      | 156  | 8%   |      | 221  | 12%  |      |
| COVID-19: economic impact | 2264 |      |      | 1995 |      |      | 1994 |      |      |
| ... No                    | 1651 | 72%  |      | 1489 | 74%  |      | 1487 | 75%  |      |
| ... Yes                   | 613  | 28%  |      | 506  | 26%  |      | 507  | 25%  |      |
| COVID-19: family impact   | 2226 | 1.09 | 1.34 | 1986 | 0.91 | 1.31 | 1975 | 0.89 | 1.27 |

## Variables

Table S2: Description of distress variables

| Variable           | Question                                                                                                                          | Measurement                   |
|--------------------|-----------------------------------------------------------------------------------------------------------------------------------|-------------------------------|
| Emotional problems | 'In the past seven days, how often have you been bothered by emotional problems such as feeling anxious, depressed or irritable?' | 1 = 'Never', 5 = 'Always'     |
| Fatigue            | 'In the past seven days, how would you rate your fatigue on average?'                                                             | 1 = 'None', 5 = 'Very severe' |
| Mental health      | 'In general, how would you rate your mental health, including your mood and your ability to think?'                               | 1 = 'Poor', 5 = 'Excellent'   |

Table S2: Description of distress variables (*continued*)

| Variable             | Question                                                                                                                                                                                                                                                                                                                                                                                                                                                                                                                                      | Measurement                                                  |
|----------------------|-----------------------------------------------------------------------------------------------------------------------------------------------------------------------------------------------------------------------------------------------------------------------------------------------------------------------------------------------------------------------------------------------------------------------------------------------------------------------------------------------------------------------------------------------|--------------------------------------------------------------|
| General unhappiness  | 'Taken all together, how would you say things are these days—would you say that you are very happy, pretty happy, or not too happy?'                                                                                                                                                                                                                                                                                                                                                                                                          | 1 = 'Very happy', '2 = 'Not too happy'                       |
| Quality of life      | 'In general, would you say your quality of life is...                                                                                                                                                                                                                                                                                                                                                                                                                                                                                         | 1 = 'Excellent', 5 = 'Poor'                                  |
| Covid reaction scale | 'Please indicate whether or not each of the following have happened to you since the outbreak of the coronavirus/COVID-19 pandemic... '<br>[Didn't feel like eating] [Smoked more than usual] [Had headaches] [Had an upset stomach] [Cried] [Had trouble getting to sleep] [Felt very nervous and tense] [Felt like getting drunk] [Felt more tired than usual] [Felt dizzy at times] [Lost my temper more than usual] [Hands sweat and felt damp and clammy] [Had rapid heart beats] [Felt sort of dazed and numb] [Kept forgetting things] | 0 = 'No', 1 = 'Yes'<br>(Scale created from sum of responses) |

Table S2: Description of distress variables (*continued*)

| Variable         | Question                                                                                                                                                                                                                                                                                                                                                                                                                                            | Measurement                                                        |
|------------------|-----------------------------------------------------------------------------------------------------------------------------------------------------------------------------------------------------------------------------------------------------------------------------------------------------------------------------------------------------------------------------------------------------------------------------------------------------|--------------------------------------------------------------------|
| Feel scale       | 'During the past few weeks did you ever feel...' [Particularly excited or interested in something] [So restless that you couldn't sit long in a chair] [Proud because someone complicated you on something you had done] [Very lonely or remote from other people] [Pleased about having accomplished something] [Bored] [On top of the world] [Depressed or very unhappy] [That things were going your way] [Upset because someone criticized you] | 0 = 'No', 1 = 'Yes'<br>(Scale created from sum of responses)       |
| Loneliness scale | 'How often in the past 4 weeks have you felt that you lack companionship?', 'How often in the past 4 weeks have you felt that you are isolated from others?', 'How often in the past 4 weeks have you felt that you are left out?'                                                                                                                                                                                                                  | 1 = 'Never', 5 = Very often' (Scale created from sum of responses) |

Table S2: Description of distress variables (*continued*)

| Variable     | Question                                                                                                                                                                                                                                                                                                          | Measurement                                                        |
|--------------|-------------------------------------------------------------------------------------------------------------------------------------------------------------------------------------------------------------------------------------------------------------------------------------------------------------------|--------------------------------------------------------------------|
| Stress scale | 'In the past 4 weeks, how often have you felt that you were unable to control the important things in your life?', 'In the past 4 weeks, how often have you felt confident about your ability to handle your personal problems?', 'In the past 4 weeks, how often have you felt that things were going your way?' | 1 = 'Never', 5 = Very often' (Scale created from sum of responses) |

Table S3: Description of independent variables

| Variable                                                                                        | Measurement                                                                    |
|-------------------------------------------------------------------------------------------------|--------------------------------------------------------------------------------|
| Party Identification                                                                            | 1 = 'Democrat', 2 = 'Independent', 3 = 'Republican'                            |
| Education                                                                                       | 1 = High school or less, 2 = Some college, 3 = BA or more                      |
| Income                                                                                          | 1 = Less than \$50,000, 2 = \$50,000 to under \$100,000, 3 = \$100,000 or more |
| Employment status                                                                               | 0 = 'Not employed', 1 = 'Employed'                                             |
| Marital status                                                                                  | 0 = 'Not married', 1 = 'Married/co-habiting'                                   |
| Race/ethnicity                                                                                  | 1 = White, 2 = Black, 3 = Hispanic, 4 = Other                                  |
| Geographic region                                                                               | 1 = Northeast, 2 = Midwest, 3 = South, 4 = West                                |
| Age                                                                                             | 18-29, 30-39, 40-59, 60-64, 65 or older                                        |
| COVID-19 info: 'How much are you watching, reading, or talking about the coronavirus/COVID-19?' | 1 = 'Never', 5 = 'Most of the time'                                            |

Table S3: Description of independent variables (*continued*)

| Variable                                                                                                                                                                                                                                      | Measurement                                               |
|-----------------------------------------------------------------------------------------------------------------------------------------------------------------------------------------------------------------------------------------------|-----------------------------------------------------------|
| COVID-19 hotspot: R lived in area with high COVID-19 infection and death rates at time of interview                                                                                                                                           | 0 = 'Not a hotspot', 1 = 'Hotspot'                        |
| COVID-19 exposure: 'During the past month, have you been exposed to someone likely to have the coronavirus/COVID-19?'                                                                                                                         | '0 = 'No', 1 = 'Yes'                                      |
| COVID-19 family diagnosis: 'During hte past month, has anyone in your family been diagnosed with the coronavirus/COVID-19?'                                                                                                                   | 0 = 'No', 1 = 'Yes'                                       |
| COVID-19 family impact scale: 'During the past month, have any of the following happened to your family members because of the coronavirus/COVID-19?'<br>[Lost or been laid off from job]<br>[Reduced ability to earn money]<br>[Passed away] | 0 = 'No', 1 = 'Yes' (Scale created from sum of responses) |
| COVID-19 economic impact: 'In what ways, if any, has the coronavirus affected your job, income, or finances: You lost income due to a workplace closure or reduced hours'                                                                     | 0 = 'No', 1 = 'Yes'                                       |

Table S4: Multivariable OLS regressions, predicting distress:  
Wave 1

|                | Emotional problems   | Fatigue              | Happiness            | Mental health        | Lonliness            | Quality of life      | Feel                 | Stress               | Covid-19 reaction    |
|----------------|----------------------|----------------------|----------------------|----------------------|----------------------|----------------------|----------------------|----------------------|----------------------|
| (Intercept)    | 3.241***<br>(0.207)  | 2.816***<br>(0.179)  | 2.212***<br>(0.125)  | 3.055***<br>(0.196)  | 9.189***<br>(0.624)  | 2.480***<br>(0.169)  | 4.429***<br>(0.416)  | 10.939***<br>(0.585) | 4.409***<br>(0.728)  |
| Independent    | 0.083<br>(0.063)     | 0.043<br>(0.055)     | 0.079*<br>(0.037)    | 0.041<br>(0.060)     | 0.208<br>(0.192)     | 0.155**<br>(0.052)   | 0.242+<br>(0.125)    | 0.183<br>(0.178)     | -0.213<br>(0.211)    |
| Republican     | -0.130**<br>(0.050)  | -0.031<br>(0.043)    | -0.116***<br>(0.029) | -0.215***<br>(0.047) | -0.342*<br>(0.151)   | -0.145***<br>(0.041) | -0.175+<br>(0.098)   | -0.446**<br>(0.140)  | -0.784***<br>(0.166) |
| Some college   | 0.065<br>(0.057)     | 0.023<br>(0.049)     | 0.051<br>(0.034)     | 0.054<br>(0.054)     | 0.396*<br>(0.173)    | -0.032<br>(0.047)    | 0.223*<br>(0.113)    | -0.021<br>(0.161)    | 0.379*<br>(0.191)    |
| BA or more     | -0.031<br>(0.065)    | -0.083<br>(0.056)    | -0.021<br>(0.038)    | -0.158**<br>(0.061)  | 0.025<br>(0.195)     | -0.298***<br>(0.053) | -0.008<br>(0.128)    | -0.526**<br>(0.181)  | 0.112<br>(0.214)     |
| \$100K or more | -0.266***<br>(0.067) | -0.209***<br>(0.057) | -0.127**<br>(0.039)  | -0.306***<br>(0.063) | -0.409*<br>(0.201)   | -0.371***<br>(0.054) | -0.360**<br>(0.131)  | -0.661***<br>(0.186) | -0.678**<br>(0.221)  |
| Employed       | -0.280***<br>(0.051) | -0.228***<br>(0.044) | -0.108***<br>(0.030) | -0.249***<br>(0.048) | -0.862***<br>(0.154) | -0.212***<br>(0.042) | -0.527***<br>(0.101) | -0.620***<br>(0.143) | -0.695***<br>(0.170) |
| Black          | -0.354***<br>(0.078) | -0.288***<br>(0.067) | -0.124**<br>(0.045)  | -0.320***<br>(0.073) | -1.274***<br>(0.234) | 0.012<br>(0.063)     | -0.785***<br>(0.152) | -0.568**<br>(0.216)  | -1.481***<br>(0.257) |
| Hispanic       | -0.221***<br>(0.067) | -0.156**<br>(0.057)  | 0.027<br>(0.039)     | -0.117+<br>(0.063)   | -0.426*<br>(0.201)   | 0.087<br>(0.054)     | -0.529***<br>(0.131) | -0.094<br>(0.187)    | -0.462*<br>(0.221)   |
| Other          | -0.161+<br>(0.084)   | -0.021<br>(0.072)    | 0.070<br>(0.049)     | -0.012<br>(0.079)    | 0.087<br>(0.251)     | 0.078<br>(0.068)     | -0.072<br>(0.165)    | 0.289<br>(0.234)     | -0.178<br>(0.274)    |
| Midwest        | -0.005<br>(0.071)    | -0.013<br>(0.061)    | 0.006<br>(0.042)     | 0.056<br>(0.067)     | -0.051<br>(0.215)    | 0.035<br>(0.058)     | 0.148<br>(0.140)     | 0.098<br>(0.199)     | 0.149<br>(0.235)     |
| South          | -0.035<br>(0.069)    | 0.077<br>(0.060)     | -0.045<br>(0.040)    | -0.013<br>(0.065)    | -0.237<br>(0.209)    | 0.058<br>(0.056)     | 0.107<br>(0.136)     | 0.166<br>(0.194)     | -0.100<br>(0.228)    |
| West           | -0.054<br>(0.072)    | -0.026<br>(0.062)    | -0.053<br>(0.042)    | -0.061<br>(0.068)    | -0.285<br>(0.217)    | 0.008<br>(0.059)     | -0.031<br>(0.141)    | -0.280<br>(0.200)    | -0.157<br>(0.236)    |
| 30-39          | -0.040<br>(0.078)    | -0.016<br>(0.067)    | 0.066<br>(0.046)     | -0.078<br>(0.074)    | 0.061<br>(0.236)     | 0.129*<br>(0.064)    | 0.168<br>(0.153)     | -0.041<br>(0.218)    | 0.089<br>(0.258)     |
| 40-59          | -0.330***            | -0.158*              | 0.109*               | -0.102               | -0.386+              | 0.271***             | -0.167               | -0.713***            | -1.146***            |



Table S4: Multivariable OLS regressions, predicting distress:  
Wave 1 (continued)

|                       | Emotional problems | Fatigue   | Happiness | Mental health | Lonliness | Quality of life | Feel      | Stress    | Covid-19 reaction |
|-----------------------|--------------------|-----------|-----------|---------------|-----------|-----------------|-----------|-----------|-------------------|
|                       | (0.075)            | (0.065)   | (0.044)   | (0.071)       | (0.227)   | (0.062)         | (0.148)   | (0.210)   | (0.249)           |
| 60-64                 | -0.577***          | -0.345*** | 0.056     | -0.430***     | -0.861**  | 0.191*          | -0.655*** | -1.795*** | -2.318***         |
|                       | (0.092)            | (0.079)   | (0.054)   | (0.087)       | (0.277)   | (0.075)         | (0.181)   | (0.257)   | (0.304)           |
| 65 or older           | -0.909***          | -0.399*** | -0.001    | -0.590***     | -1.419*** | 0.038           | -1.185*** | -2.322*** | -3.115***         |
|                       | (0.084)            | (0.072)   | (0.049)   | (0.079)       | (0.252)   | (0.068)         | (0.165)   | (0.234)   | (0.277)           |
| Rarely                | -0.166             | -0.185    | -0.082    | 0.027         | -0.563    | 0.140           | -0.313    | 0.149     | 0.300             |
|                       | (0.193)            | (0.166)   | (0.117)   | (0.182)       | (0.580)   | (0.158)         | (0.386)   | (0.545)   | (0.684)           |
| Often                 | -0.001             | -0.064    | -0.035    | 0.039         | -0.192    | 0.103           | -0.323    | 0.244     | 1.238+            |
|                       | (0.187)            | (0.161)   | (0.113)   | (0.177)       | (0.562)   | (0.153)         | (0.374)   | (0.528)   | (0.664)           |
| Occasionally          | -0.068             | -0.103    | -0.078    | 0.018         | -0.398    | 0.104           | -0.396    | 0.166     | 0.599             |
|                       | (0.186)            | (0.160)   | (0.113)   | (0.176)       | (0.561)   | (0.152)         | (0.374)   | (0.527)   | (0.663)           |
| Most of the time      | 0.132              | 0.017     | 0.062     | 0.050         | 0.396     | 0.223           | -0.095    | 0.493     | 1.833**           |
|                       | (0.194)            | (0.167)   | (0.117)   | (0.184)       | (0.584)   | (0.159)         | (0.389)   | (0.549)   | (0.688)           |
| Hotspot               | 0.008              | 0.005     | 0.058+    | 0.004         | 0.213     | 0.086+          | 0.081     | 0.194     | -0.054            |
|                       | (0.057)            | (0.049)   | (0.033)   | (0.054)       | (0.172)   | (0.046)         | (0.112)   | (0.159)   | (0.189)           |
| Family diagnosis      | -0.124             | 0.024     | -0.079    | -0.157+       | -0.061    | -0.096          | 0.258     | -0.421    | -0.435            |
|                       | (0.093)            | (0.080)   | (0.054)   | (0.088)       | (0.284)   | (0.076)         | (0.181)   | (0.260)   | (0.308)           |
| Impacted economically | 0.143**            | 0.088+    | 0.067*    | -0.018        | 0.314*    | 0.157***        | 0.243*    | 0.284+    | 0.806***          |
|                       | (0.052)            | (0.045)   | (0.031)   | (0.050)       | (0.158)   | (0.043)         | (0.103)   | (0.146)   | (0.172)           |
| Family impacted       | 0.094***           | 0.064***  | 0.055***  | 0.088***      | 0.269***  | 0.083***        | 0.113**   | 0.322***  | 0.575***          |
|                       | (0.019)            | (0.016)   | (0.011)   | (0.018)       | (0.058)   | (0.016)         | (0.037)   | (0.053)   | (0.063)           |
| Num.Obs.              | 2192               | 2195      | 2189      | 2195          | 2185      | 2197            | 2151      | 2175      | 2138              |
| R2                    | 0.150              | 0.084     | 0.087     | 0.127         | 0.135     | 0.181           | 0.112     | 0.162     | 0.243             |
| R2 Adj.               | 0.139              | 0.072     | 0.075     | 0.117         | 0.124     | 0.170           | 0.101     | 0.151     | 0.233             |
| AIC                   | 6204.6             | 5559.5    | 3855.9    | 5971.5        | 11 000.7  | 5333.2          | 8951.9    | 10 605.3  | 11 113.2          |
| BIC                   | 6369.7             | 5724.6    | 4020.9    | 6136.6        | 11 165.7  | 5498.4          | 9116.4    | 10 770.2  | 11 277.5          |
| Log.Lik.              | -3073.309          | -2750.742 | -1898.929 | -2956.755     | -5471.352 | -2637.612       | -4446.938 | -5273.669 | -5527.579         |

Table S4: Multivariable OLS regressions, predicting distress:  
Wave 1 (*continued*)

|                                                   | Emotional<br>problems | Fatigue | Happiness | Mental<br>health | Lonliness | Quality of<br>life | Feel  | Stress | Covid-19<br>reaction |
|---------------------------------------------------|-----------------------|---------|-----------|------------------|-----------|--------------------|-------|--------|----------------------|
| F                                                 | 14.096                | 7.350   | 7.597     | 11.723           | 12.426    | 17.701             | 9.962 | 15.362 | 25.082               |
| + p < 0.1, * p < 0.05, ** p < 0.01, *** p < 0.001 |                       |         |           |                  |           |                    |       |        |                      |

Table S5: Multivariable OLS regressions, predicting distress:  
Wave 2

|                | Emotional problems   | Fatigue              | Happiness            | Mental health        | Lonliness            | Quality of life      | Feel                 | Stress               | Covid-19 reaction    |
|----------------|----------------------|----------------------|----------------------|----------------------|----------------------|----------------------|----------------------|----------------------|----------------------|
| (Intercept)    | 3.086***<br>(0.200)  | 2.603***<br>(0.170)  | 2.112***<br>(0.117)  | 3.285***<br>(0.182)  | 9.272***<br>(0.587)  | 2.863***<br>(0.158)  | 5.153***<br>(0.393)  | 12.270***<br>(0.574) | 5.170***<br>(0.672)  |
| Independent    | 0.173*<br>(0.069)    | 0.132*<br>(0.059)    | 0.070+<br>(0.041)    | 0.048<br>(0.063)     | 0.332<br>(0.204)     | 0.119*<br>(0.055)    | 0.216<br>(0.137)     | -0.051<br>(0.201)    | -0.154<br>(0.234)    |
| Republican     | -0.120*<br>(0.054)   | -0.007<br>(0.046)    | -0.089**<br>(0.032)  | -0.146**<br>(0.049)  | -0.378*<br>(0.160)   | -0.139**<br>(0.043)  | -0.052<br>(0.108)    | -0.327*<br>(0.157)   | -0.569**<br>(0.183)  |
| Some college   | 0.174**<br>(0.063)   | 0.092+<br>(0.054)    | 0.053<br>(0.037)     | -0.056<br>(0.057)    | 0.484**<br>(0.185)   | -0.042<br>(0.050)    | 0.223+<br>(0.125)    | -0.034<br>(0.182)    | 0.485*<br>(0.213)    |
| BA or more     | 0.085<br>(0.070)     | -0.061<br>(0.059)    | -0.021<br>(0.041)    | -0.290***<br>(0.064) | 0.031<br>(0.206)     | -0.283***<br>(0.055) | -0.085<br>(0.139)    | -0.410*<br>(0.202)   | 0.236<br>(0.235)     |
| \$100K or more | -0.294***<br>(0.072) | -0.273***<br>(0.061) | -0.182***<br>(0.042) | -0.360***<br>(0.065) | -0.340<br>(0.211)    | -0.451***<br>(0.056) | -0.395**<br>(0.142)  | -0.833***<br>(0.207) | -0.651**<br>(0.240)  |
| Employed       | -0.281***<br>(0.055) | -0.207***<br>(0.047) | -0.073*<br>(0.032)   | -0.199***<br>(0.050) | -0.801***<br>(0.162) | -0.188***<br>(0.043) | -0.695***<br>(0.109) | -0.777***<br>(0.159) | -0.754***<br>(0.185) |
| Black          | -0.468***<br>(0.086) | -0.243***<br>(0.073) | -0.114*<br>(0.050)   | -0.296***<br>(0.078) | -1.172***<br>(0.254) | 0.002<br>(0.068)     | -0.507**<br>(0.170)  | -0.750**<br>(0.248)  | -1.642***<br>(0.288) |
| Hispanic       | -0.146*<br>(0.073)   | -0.184**<br>(0.062)  | -0.023<br>(0.043)    | -0.113+<br>(0.066)   | -0.269<br>(0.214)    | 0.067<br>(0.057)     | -0.272+<br>(0.145)   | -0.128<br>(0.210)    | -0.796**<br>(0.245)  |
| Other          | -0.104<br>(0.090)    | -0.026<br>(0.076)    | 0.011<br>(0.053)     | -0.074<br>(0.082)    | -0.038<br>(0.264)    | 0.088<br>(0.071)     | -0.069<br>(0.178)    | 0.054<br>(0.259)     | -0.465<br>(0.299)    |
| Midwest        | -0.028<br>(0.077)    | -0.008<br>(0.065)    | 0.051<br>(0.045)     | 0.159*<br>(0.070)    | -0.011<br>(0.227)    | 0.104+<br>(0.061)    | 0.113<br>(0.152)     | 0.070<br>(0.222)     | 0.137<br>(0.258)     |
| South          | -0.025<br>(0.075)    | 0.017<br>(0.064)     | 0.018<br>(0.044)     | 0.050<br>(0.068)     | 0.061<br>(0.221)     | 0.062<br>(0.059)     | 0.019<br>(0.148)     | 0.044<br>(0.216)     | 0.283<br>(0.251)     |
| West           | -0.023<br>(0.078)    | 0.007<br>(0.066)     | -0.009<br>(0.045)    | 0.100<br>(0.070)     | -0.174<br>(0.229)    | 0.062<br>(0.061)     | 0.028<br>(0.153)     | -0.076<br>(0.223)    | 0.213<br>(0.260)     |
| 30-39          | -0.103<br>(0.085)    | -0.020<br>(0.072)    | 0.067<br>(0.050)     | -0.119<br>(0.078)    | -0.022<br>(0.251)    | 0.162*<br>(0.067)    | 0.024<br>(0.169)     | -0.092<br>(0.246)    | -0.419<br>(0.286)    |
| 40-59          | -0.341***            | -0.014               | 0.152**              | -0.119               | -0.249               | 0.299***             | -0.301+              | -0.563*              | -1.581***            |

Table S5: Multivariable OLS regressions, predicting distress:  
Wave 2 (continued)

|                       | Emotional problems | Fatigue   | Happiness | Mental health | Lonliness | Quality of life | Feel      | Stress    | Covid-19 reaction |
|-----------------------|--------------------|-----------|-----------|---------------|-----------|-----------------|-----------|-----------|-------------------|
|                       | (0.083)            | (0.070)   | (0.049)   | (0.075)       | (0.243)   | (0.065)         | (0.164)   | (0.238)   | (0.277)           |
| 60-64                 | -0.651***          | -0.200*   | 0.137*    | -0.443***     | -0.832**  | 0.194*          | -0.820*** | -1.733*** | -3.023***         |
|                       | (0.100)            | (0.085)   | (0.059)   | (0.091)       | (0.296)   | (0.079)         | (0.199)   | (0.290)   | (0.338)           |
| 65 or older           | -0.878***          | -0.343*** | 0.005     | -0.652***     | -1.565*** | 0.026           | -1.293*** | -2.279*** | -3.399***         |
|                       | (0.092)            | (0.079)   | (0.054)   | (0.084)       | (0.272)   | (0.073)         | (0.184)   | (0.267)   | (0.311)           |
| Rarely                | -0.273             | -0.195    | -0.095    | -0.243        | -1.225*   | -0.279*         | -1.157*** | -1.323**  | -0.046            |
|                       | (0.177)            | (0.150)   | (0.104)   | (0.161)       | (0.520)   | (0.140)         | (0.348)   | (0.509)   | (0.597)           |
| Often                 | 0.000              | 0.015     | 0.042     | -0.111        | -0.470    | -0.214          | -0.882**  | -0.965+   | 0.973+            |
|                       | (0.173)            | (0.147)   | (0.102)   | (0.158)       | (0.509)   | (0.137)         | (0.341)   | (0.498)   | (0.584)           |
| Occasionally          | -0.161             | -0.055    | -0.048    | -0.177        | -1.033*   | -0.240+         | -0.995**  | -1.255*   | 0.392             |
|                       | (0.172)            | (0.146)   | (0.101)   | (0.156)       | (0.504)   | (0.135)         | (0.337)   | (0.493)   | (0.577)           |
| Most of the time      | 0.180              | 0.087     | 0.092     | 0.008         | -0.052    | -0.199          | -0.397    | -0.875    | 2.030**           |
|                       | (0.188)            | (0.160)   | (0.111)   | (0.172)       | (0.554)   | (0.149)         | (0.370)   | (0.542)   | (0.634)           |
| Hotspot               | 0.030              | 0.065     | 0.094**   | 0.086         | 0.223     | 0.049           | 0.106     | 0.466**   | 0.178             |
|                       | (0.062)            | (0.052)   | (0.036)   | (0.056)       | (0.182)   | (0.049)         | (0.122)   | (0.179)   | (0.208)           |
| Family diagnosis      | -0.161             | 0.003     | -0.090    | -0.033        | 0.084     | -0.170*         | -0.027    | -0.377    | -0.578            |
|                       | (0.102)            | (0.087)   | (0.060)   | (0.093)       | (0.302)   | (0.081)         | (0.204)   | (0.295)   | (0.353)           |
| Impacted economically | 0.136*             | 0.065     | 0.071*    | 0.051         | 0.503**   | 0.135**         | 0.312**   | 0.430*    | 0.443*            |
|                       | (0.058)            | (0.050)   | (0.034)   | (0.053)       | (0.171)   | (0.046)         | (0.115)   | (0.168)   | (0.195)           |
| Family impacted       | 0.140***           | 0.105***  | 0.037**   | 0.057**       | 0.237***  | 0.063***        | 0.146***  | 0.356***  | 0.728***          |
|                       | (0.022)            | (0.019)   | (0.013)   | (0.020)       | (0.064)   | (0.017)         | (0.043)   | (0.063)   | (0.074)           |
| Num.Obs.              | 1960               | 1956      | 1960      | 1959          | 1950      | 1962            | 1930      | 1940      | 1913              |
| R2                    | 0.169              | 0.100     | 0.077     | 0.146         | 0.139     | 0.169           | 0.122     | 0.152     | 0.234             |
| R2 Adj.               | 0.157              | 0.087     | 0.064     | 0.134         | 0.127     | 0.157           | 0.109     | 0.140     | 0.223             |
| AIC                   | 5631.9             | 4979.1    | 3548.4    | 5257.1        | 9804.1    | 4705.7          | 8151.9    | 9667.3    | 10090.6           |
| BIC                   | 5793.8             | 5140.9    | 3710.2    | 5418.9        | 9965.8    | 4867.6          | 8313.3    | 9828.8    | 10251.8           |
| Log.Lik.              | -2786.955          | -2460.539 | -1745.186 | -2599.528     | -4873.071 | -2323.852       | -4046.930 | -4804.636 | -5016.312         |

Table S5: Multivariable OLS regressions, predicting distress:  
Wave 2 (*continued*)

|                                                   | Emotional<br>problems | Fatigue | Happiness | Mental<br>health | Lonliness | Quality of<br>life | Feel  | Stress | Covid-19<br>reaction |
|---------------------------------------------------|-----------------------|---------|-----------|------------------|-----------|--------------------|-------|--------|----------------------|
| F                                                 | 14.541                | 7.898   | 5.981     | 12.183           | 11.490    | 14.532             | 9.784 | 12.662 | 21.357               |
| + p < 0.1, * p < 0.05, ** p < 0.01, *** p < 0.001 |                       |         |           |                  |           |                    |       |        |                      |

Table S6: Multivariable OLS regressions, predicting distress:  
Wave 3

|                | Emotional problems   | Fatigue              | Happiness            | Mental health        | Lonliness            | Quality of life      | Feel                 | Stress               | Covid-19 reaction    |
|----------------|----------------------|----------------------|----------------------|----------------------|----------------------|----------------------|----------------------|----------------------|----------------------|
| (Intercept)    | 2.636***<br>(0.225)  | 2.632***<br>(0.190)  | 1.833***<br>(0.132)  | 2.782***<br>(0.204)  | 7.677***<br>(0.675)  | 2.332***<br>(0.177)  | 3.473***<br>(0.463)  | 10.534***<br>(0.640) | 5.337***<br>(0.762)  |
| Independent    | 0.003<br>(0.069)     | 0.007<br>(0.058)     | 0.050<br>(0.040)     | -0.025<br>(0.063)    | 0.266<br>(0.205)     | 0.094+<br>(0.054)    | 0.167<br>(0.138)     | 0.367+<br>(0.196)    | -0.409+<br>(0.235)   |
| Republican     | -0.097+<br>(0.054)   | -0.013<br>(0.046)    | -0.038<br>(0.032)    | -0.181***<br>(0.049) | -0.284+<br>(0.162)   | -0.137**<br>(0.043)  | -0.144<br>(0.108)    | -0.139<br>(0.155)    | -0.614***<br>(0.185) |
| Some college   | 0.068<br>(0.064)     | 0.042<br>(0.054)     | 0.002<br>(0.038)     | -0.050<br>(0.058)    | 0.224<br>(0.191)     | -0.021<br>(0.050)    | 0.026<br>(0.129)     | -0.331+<br>(0.184)   | 0.452*<br>(0.220)    |
| BA or more     | -0.009<br>(0.071)    | -0.112+<br>(0.060)   | -0.073+<br>(0.042)   | -0.258***<br>(0.064) | 0.020<br>(0.211)     | -0.257***<br>(0.056) | -0.218<br>(0.142)    | -0.540**<br>(0.203)  | 0.177<br>(0.242)     |
| \$100K or more | -0.250***<br>(0.072) | -0.257***<br>(0.061) | -0.142***<br>(0.042) | -0.339***<br>(0.066) | -0.504*<br>(0.214)   | -0.490***<br>(0.057) | -0.352*<br>(0.143)   | -0.907***<br>(0.206) | -0.765**<br>(0.244)  |
| Employed       | -0.220***<br>(0.056) | -0.223***<br>(0.047) | -0.076*<br>(0.033)   | -0.192***<br>(0.051) | -0.657***<br>(0.166) | -0.192***<br>(0.044) | -0.366***<br>(0.111) | -0.608***<br>(0.159) | -0.756***<br>(0.190) |
| Black          | -0.482***<br>(0.087) | -0.296***<br>(0.073) | -0.082<br>(0.051)    | -0.284***<br>(0.078) | -1.116***<br>(0.258) | -0.075<br>(0.068)    | -0.704***<br>(0.174) | -0.656**<br>(0.247)  | -1.849***<br>(0.297) |
| Hispanic       | -0.166*<br>(0.073)   | -0.127*<br>(0.061)   | 0.059<br>(0.043)     | -0.138*<br>(0.066)   | -0.220<br>(0.216)    | 0.033<br>(0.057)     | -0.192<br>(0.144)    | -0.258<br>(0.207)    | -0.824***<br>(0.249) |
| Other          | -0.189*<br>(0.092)   | -0.054<br>(0.077)    | 0.083<br>(0.053)     | -0.027<br>(0.083)    | -0.142<br>(0.271)    | 0.148*<br>(0.072)    | -0.289<br>(0.181)    | 0.028<br>(0.260)     | -0.854**<br>(0.310)  |
| Midwest        | -0.092<br>(0.078)    | -0.057<br>(0.066)    | 0.083+<br>(0.046)    | 0.004<br>(0.071)     | -0.082<br>(0.231)    | 0.068<br>(0.061)     | 0.084<br>(0.155)     | -0.096<br>(0.223)    | -0.014<br>(0.265)    |
| South          | -0.084<br>(0.076)    | -0.074<br>(0.064)    | -0.016<br>(0.044)    | -0.101<br>(0.069)    | -0.061<br>(0.226)    | 0.040<br>(0.060)     | 0.069<br>(0.151)     | 0.118<br>(0.218)     | -0.141<br>(0.259)    |
| West           | -0.080<br>(0.078)    | -0.078<br>(0.065)    | 0.020<br>(0.045)     | -0.041<br>(0.071)    | -0.190<br>(0.231)    | 0.024<br>(0.061)     | 0.186<br>(0.154)     | -0.112<br>(0.223)    | 0.114<br>(0.266)     |
| 30-39          | -0.031<br>(0.085)    | 0.013<br>(0.071)     | 0.118*<br>(0.050)    | -0.050<br>(0.077)    | 0.339<br>(0.252)     | 0.163*<br>(0.067)    | 0.111<br>(0.168)     | -0.119<br>(0.242)    | -0.028<br>(0.289)    |
| 40-59          | -0.267**             | -0.083               | 0.176***             | -0.084               | -0.213               | 0.359***             | -0.116               | -0.592*              | -1.264***            |

Table S6: Multivariable OLS regressions, predicting distress:  
Wave 3 (continued)

|                       | Emotional problems | Fatigue   | Happiness | Mental health | Lonliness | Quality of life | Feel      | Stress    | Covid-19 reaction |
|-----------------------|--------------------|-----------|-----------|---------------|-----------|-----------------|-----------|-----------|-------------------|
|                       | (0.082)            | (0.069)   | (0.048)   | (0.074)       | (0.242)   | (0.064)         | (0.162)   | (0.233)   | (0.279)           |
| 60-64                 | -0.553***          | -0.212*   | 0.126*    | -0.310***     | -0.474    | 0.268***        | -0.539**  | -1.704*** | -2.527***         |
|                       | (0.101)            | (0.085)   | (0.059)   | (0.091)       | (0.298)   | (0.079)         | (0.199)   | (0.287)   | (0.341)           |
| 65 or older           | -0.798***          | -0.383*** | 0.037     | -0.573***     | -1.119*** | 0.062           | -1.002*** | -2.339*** | -3.221***         |
|                       | (0.093)            | (0.078)   | (0.054)   | (0.084)       | (0.275)   | (0.073)         | (0.184)   | (0.265)   | (0.316)           |
| Rarely                | 0.284              | -0.010    | 0.174     | 0.354+        | 0.331     | 0.279+          | 0.324     | 0.467     | -0.375            |
|                       | (0.204)            | (0.172)   | (0.119)   | (0.185)       | (0.614)   | (0.160)         | (0.422)   | (0.579)   | (0.690)           |
| Often                 | 0.510*             | 0.118     | 0.348**   | 0.442*        | 1.014+    | 0.336*          | 0.456     | 1.074+    | 0.748             |
|                       | (0.198)            | (0.167)   | (0.116)   | (0.179)       | (0.596)   | (0.155)         | (0.410)   | (0.562)   | (0.668)           |
| Occasionally          | 0.467*             | 0.109     | 0.224+    | 0.393*        | 0.590     | 0.353*          | 0.404     | 0.873     | 0.286             |
|                       | (0.198)            | (0.167)   | (0.116)   | (0.179)       | (0.595)   | (0.155)         | (0.410)   | (0.562)   | (0.668)           |
| Most of the time      | 0.621**            | 0.142     | 0.415***  | 0.463*        | 1.205+    | 0.400*          | 0.721+    | 1.416*    | 1.589*            |
|                       | (0.208)            | (0.175)   | (0.122)   | (0.189)       | (0.626)   | (0.164)         | (0.429)   | (0.592)   | (0.704)           |
| Hotspot               | 0.037              | 0.066     | 0.043     | 0.036         | 0.264     | 0.118*          | 0.213+    | 0.314+    | 0.173             |
|                       | (0.062)            | (0.052)   | (0.036)   | (0.056)       | (0.183)   | (0.048)         | (0.122)   | (0.175)   | (0.210)           |
| Family diagnosis      | -0.085             | 0.046     | -0.004    | 0.000         | 0.200     | -0.109          | 0.085     | -0.126    | -0.249            |
|                       | (0.091)            | (0.076)   | (0.053)   | (0.082)       | (0.270)   | (0.071)         | (0.182)   | (0.260)   | (0.311)           |
| Impacted economically | 0.106+             | 0.043     | 0.047     | 0.032         | 0.293+    | 0.085+          | 0.293**   | 0.361*    | 0.759***          |
|                       | (0.057)            | (0.048)   | (0.033)   | (0.052)       | (0.168)   | (0.045)         | (0.113)   | (0.163)   | (0.194)           |
| Family impacted       | 0.139***           | 0.106***  | 0.043**   | 0.067***      | 0.226***  | 0.053**         | 0.185***  | 0.351***  | 0.717***          |
|                       | (0.022)            | (0.019)   | (0.013)   | (0.020)       | (0.067)   | (0.018)         | (0.045)   | (0.064)   | (0.076)           |
| Num.Obs.              | 1957               | 1960      | 1956      | 1956          | 1941      | 1961            | 1914      | 1938      | 1921              |
| R2                    | 0.137              | 0.092     | 0.079     | 0.122         | 0.119     | 0.170           | 0.092     | 0.149     | 0.231             |
| R2 Adj.               | 0.125              | 0.079     | 0.066     | 0.110         | 0.107     | 0.159           | 0.079     | 0.137     | 0.220             |
| AIC                   | 5654.2             | 4989.0    | 3548.5    | 5266.6        | 9817.2    | 4717.0          | 8116.7    | 9642.1    | 10 224.0          |
| BIC                   | 5816.0             | 5150.9    | 3710.2    | 5428.3        | 9978.7    | 4878.8          | 8277.8    | 9803.6    | 10 385.3          |
| Log.Lik.              | -2798.105          | -2465.514 | -1745.233 | -2604.279     | -4879.577 | -2329.494       | -4029.330 | -4792.059 | -5083.025         |

Table S6: Multivariable OLS regressions, predicting distress:  
Wave 3 (*continued*)

|                                                   | Emotional<br>problems | Fatigue | Happiness | Mental<br>health | Lonliness | Quality of<br>life | Feel  | Stress | Covid-19<br>reaction |
|---------------------------------------------------|-----------------------|---------|-----------|------------------|-----------|--------------------|-------|--------|----------------------|
| F                                                 | 11.337                | 7.208   | 6.090     | 9.924            | 9.611     | 14.707             | 7.098 | 12.372 | 21.057               |
| + p < 0.1, * p < 0.05, ** p < 0.01, *** p < 0.001 |                       |         |           |                  |           |                    |       |        |                      |



## Supplementary figures

### *Counterfactual unhappiness gap trends*

Figure 2 displays the partisan gap in unhappiness over time, including a counterfactual scenario. The red line indicates what the gap would have been in 2020 if Black Democrats experienced the same level of distress as White Democrats. The counterfactual highlights the impact of the relatively low increase in distress among Black Democrats in 2020 on the partisan unhappiness gap.

### *GSS 2016-2020 Panel*

The GSS released the 2020 companion data to the 2016 and 2018 panel waves in May of 2021. Respondents were matched from either the 2016 and 2018 waves in 2020, but no respondents were interviewed in all three waves. 2020 interviews were conducted in September of 2020, meaning that these data were collected at least one month after the last wave of the NORC COVID-19 Response Survey data. Figures 3 and 4 plot partisan trends for two samples. Figure 3 shows overall trends of unhappiness with combined samples. Figure 4 plots unhappiness trends, limited to respondents that maintained the same partisan I.D. between their respective first and second interviews. Figure 4 allows us to control for the potential of party I.D. switching affecting partisan trends in unhappiness. The results provide additional evidence of increased distress during the pandemic for all respondents. Further, these results provide some evidence that the partisan gap may have increased at later points in 2020 (compared to trends seen in the NORC COVID-19 Response Survey data). Given small sample sizes—especially once broken down into sub-party groups for those who held consistent party I.D.s—we are hesitant to draw any strong conclusions about within-party trends.

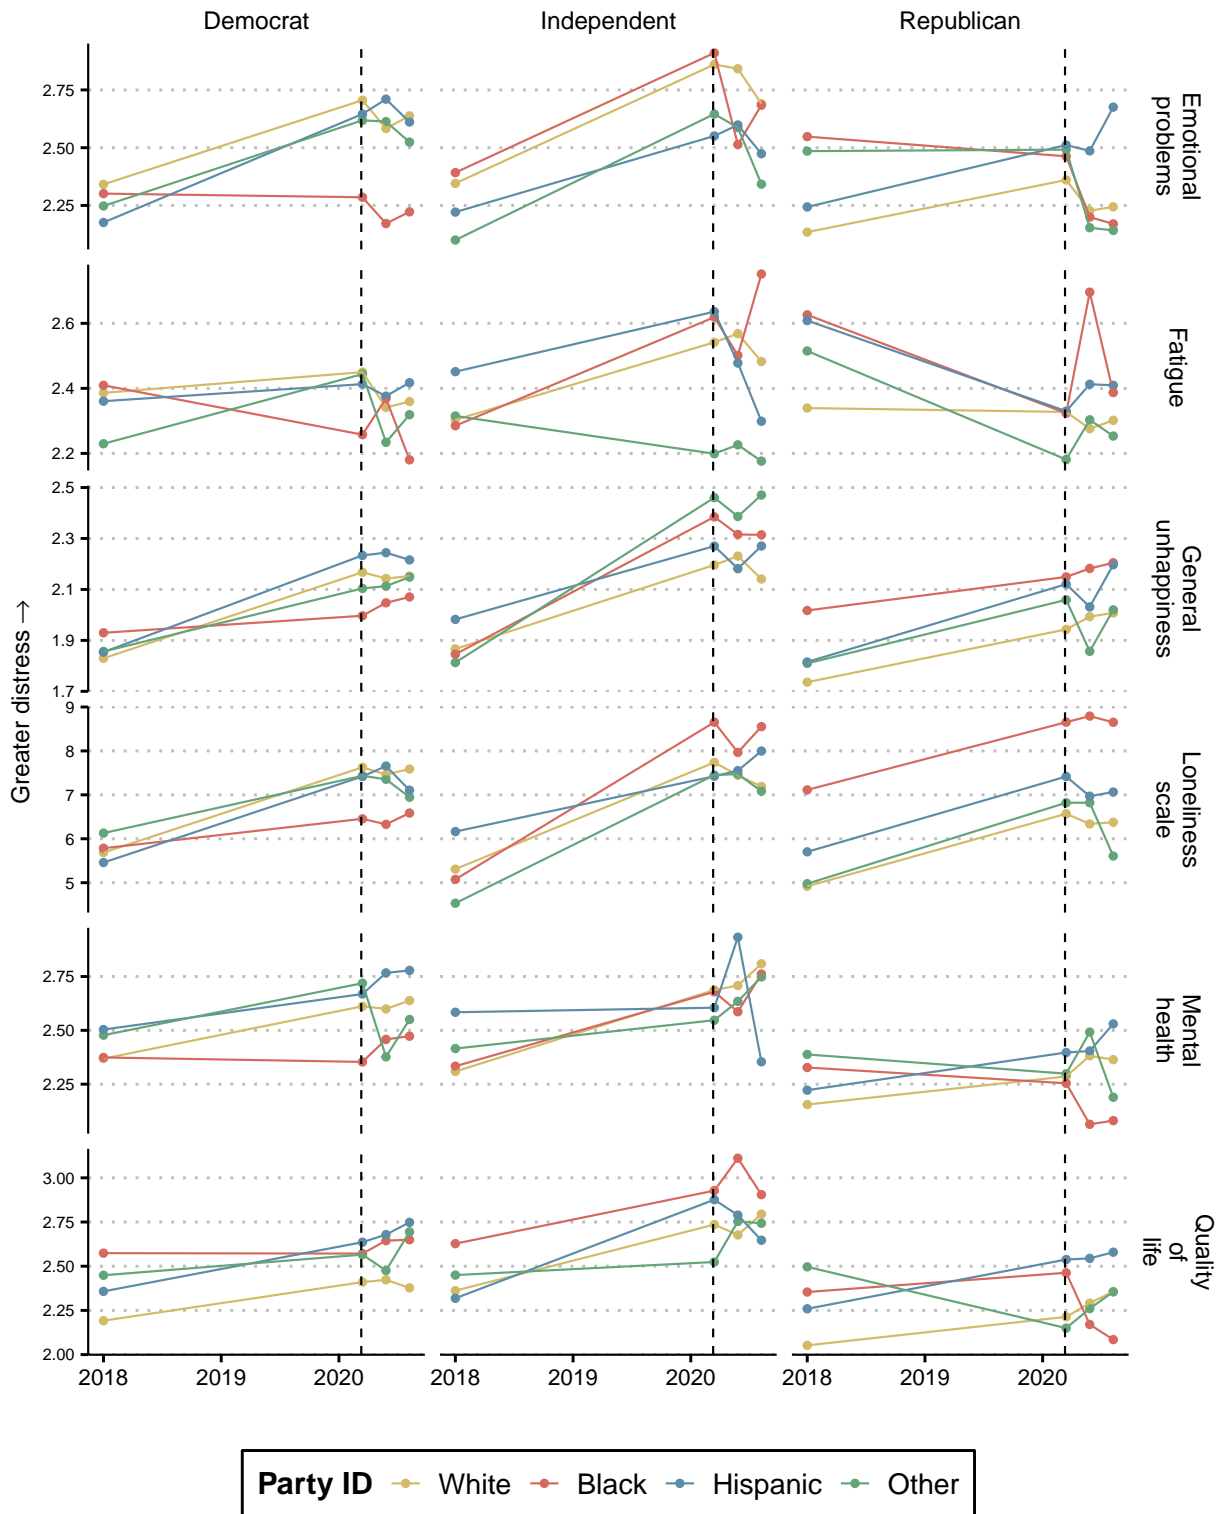

Note: Points indicate mean response by group. Higher values = greater distress. Dashed line indicates beginning of pandemic. 'White' includes non-hispanic whites only.

Figure S1: Distress trends: PartyXRace

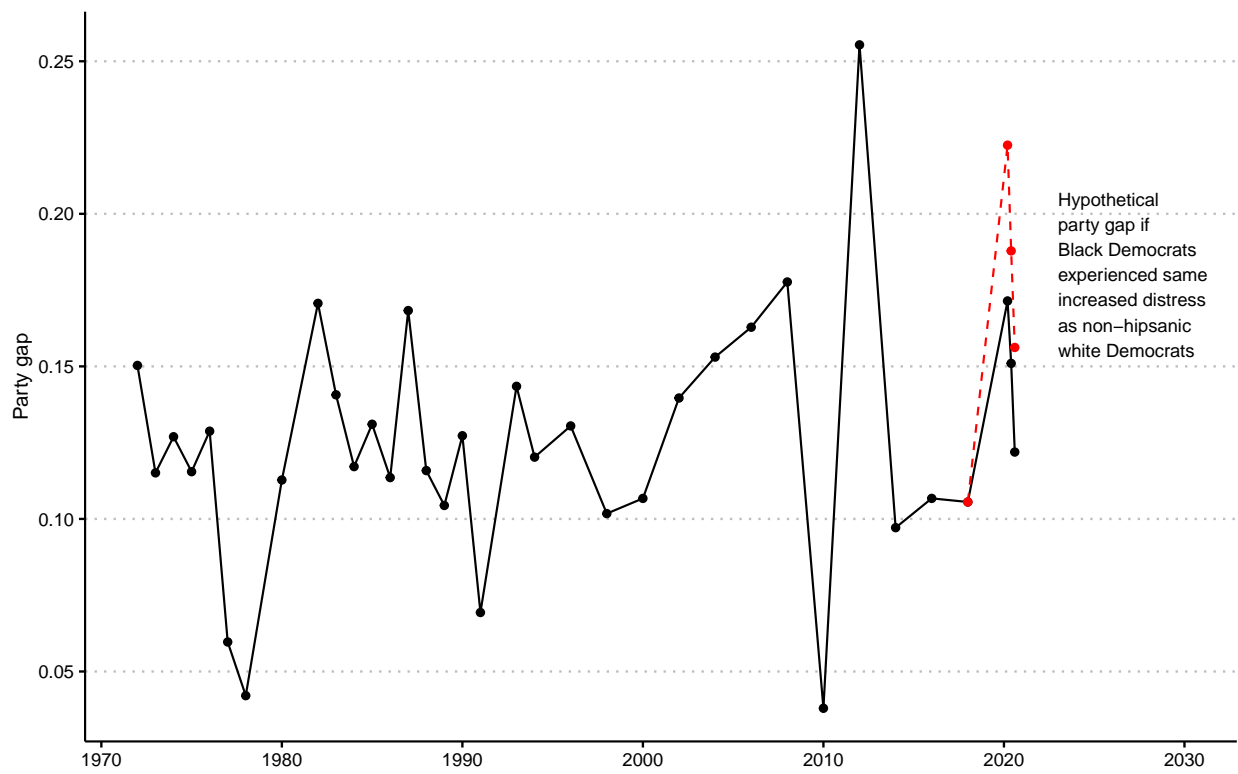

Figure S2: Counterfactual party gap if black Democrats experienced same distress as white Democrats

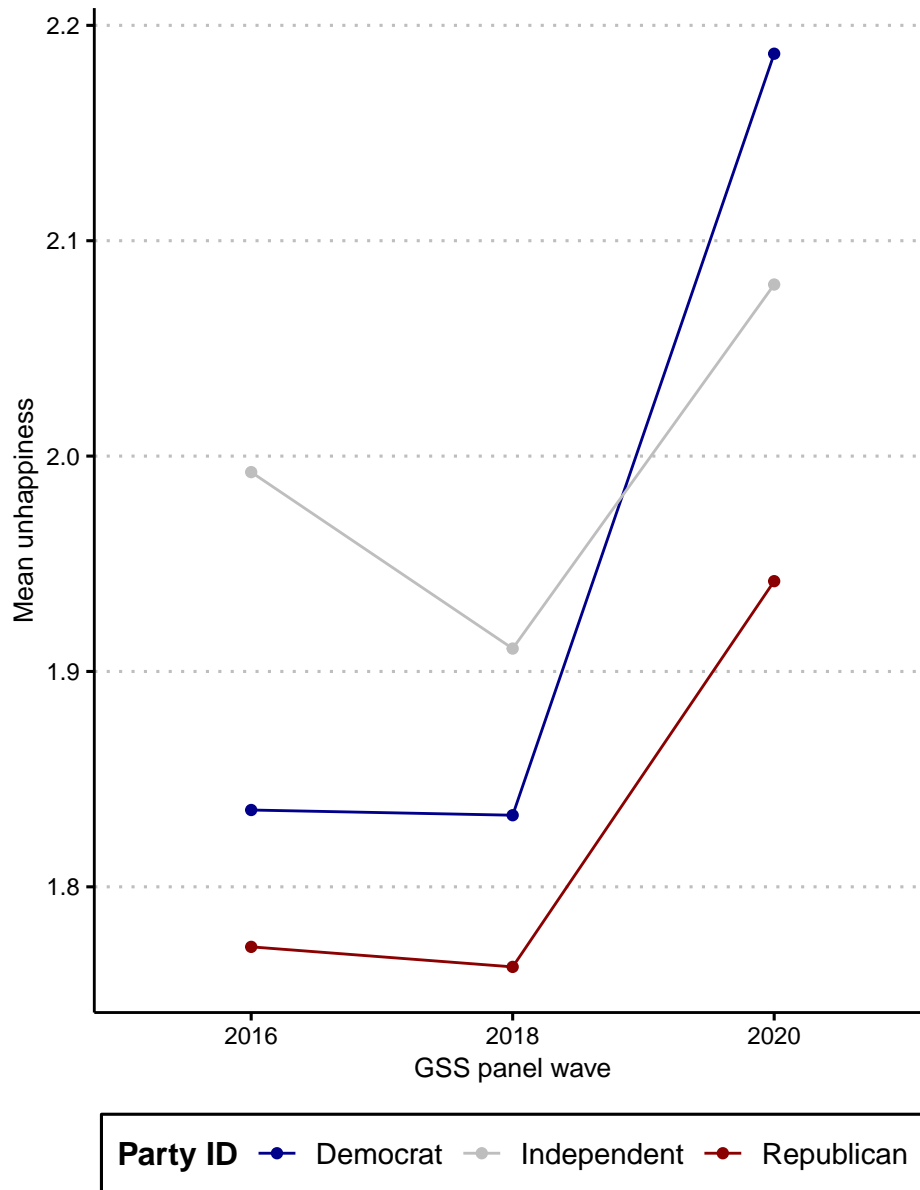

Figure S3: Unhappiness partisan trends with GSS panel data, 2016-2020. Trends include combined samples.

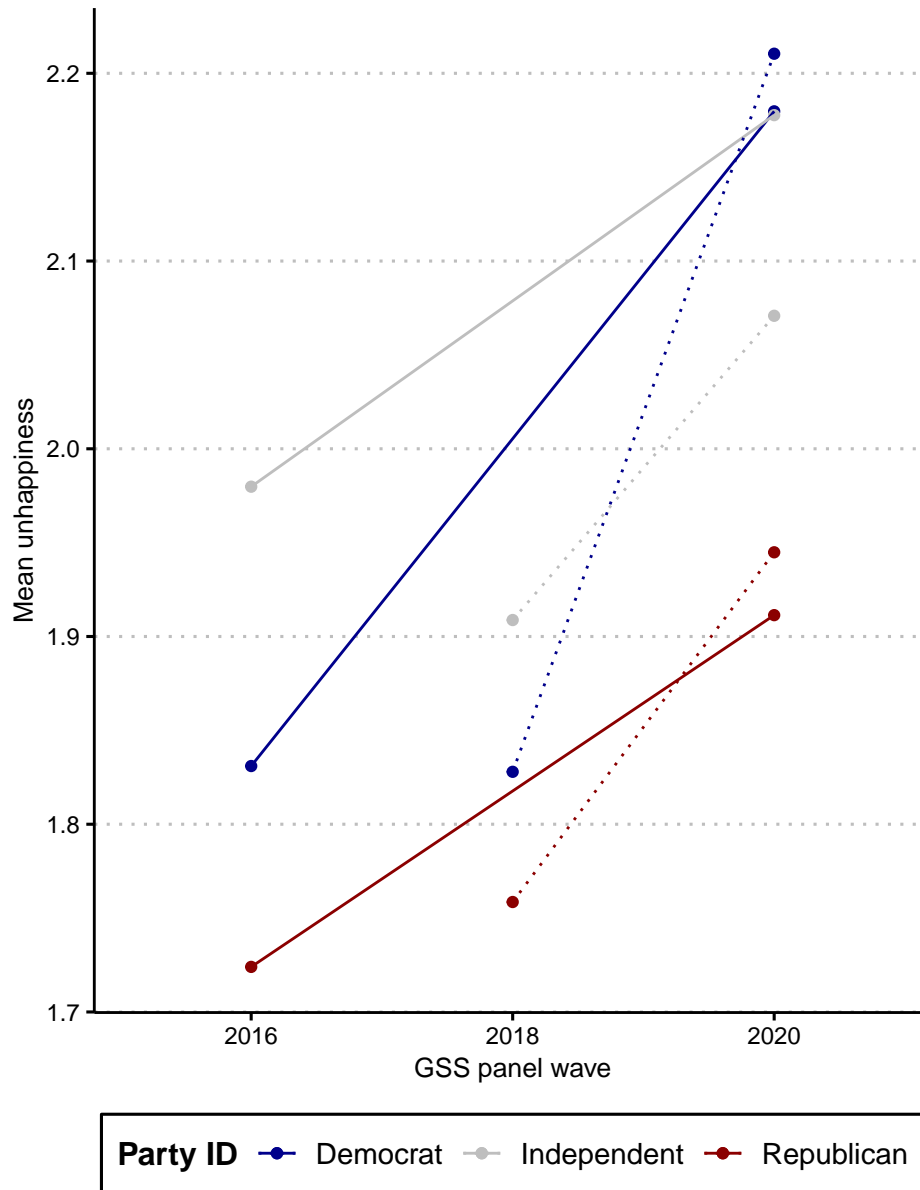

Figure S4: Unhappiness partisan trends with matched GSS panel data. Sample limited to respondents with consistent partisan I.D. across both waves.
